# Supplementary material for: Linear distributed source modeling of local field potentials recorded with intra-cortical electrode arrays
Source: PubMed Central journal article supplement (PMC5734682; doi:10.1371/journal.pone.0187490), 2017-12-18
Supplement: pone.0187490.s001.pdf [file pone.0187490.s001.pdf]

## The potential of a homogeneous voxel

Below, we generalize the formula derived in (Hummer, 1996) to the case of anisotropic voxels and simplify the expressions. Let the voxel be given by the rectangular volume  $[-a, a] \times [-b, b] \times [-c, c]$  for certain constants  $a, b, c > 0$  and suppose that  $\rho = 1$  on the rectangle. The electric potential is then given by

$$V(u, v, w) = \frac{1}{4\pi} \int_{-a}^a \int_{-b}^b \int_{-c}^c \frac{dxdydz}{\sqrt{\sigma_y \sigma_z (x-u)^2 + \sigma_z \sigma_x (y-v)^2 + \sigma_x \sigma_y (z-w)^2}} \quad (1)$$

Integrating by parts yields

$$\begin{aligned} 2V(u, v, w) &= \frac{1}{4\pi} \int_{-a-u}^{a-u} \int_{-b-v}^{b-v} \frac{z dx dy}{\sqrt{\sigma_u^2 x^2 + \sigma_v^2 y^2 + \sigma_w^2 z^2}} \Big|_{z_0}^{z_1} \\ &+ \frac{1}{4\pi} \int_{-a-u}^{a-u} \int_{-c-w}^{c-w} \frac{y dx dz}{\sqrt{\sigma_u^2 x^2 + \sigma_v^2 y^2 + \sigma_w^2 z^2}} \Big|_{y_0}^{y_1} \\ &+ \frac{1}{4\pi} \int_{-b-v}^{b-v} \int_{-c-w}^{c-w} \frac{x dy dz}{\sqrt{\sigma_u^2 x^2 + \sigma_v^2 y^2 + \sigma_w^2 z^2}} \Big|_{x_0}^{x_1}, \end{aligned}$$

where we have defined  $\sigma_u = \sqrt{\sigma_y \sigma_z}$ ,  $\sigma_v = \sqrt{\sigma_z \sigma_x}$  and  $\sigma_w = \sqrt{\sigma_x \sigma_y}$ . By using the identities

$$\int_{y_0}^{y_1} \frac{dy}{\sqrt{x^2 + y^2 + z^2}} = \log \frac{\sqrt{x^2 + y_1^2 + z^2} + y_1}{\sqrt{x^2 + y_0^2 + z^2} + y_0},$$

and

$$\begin{aligned} \int_{x_0}^{x_1} \log \left( \sqrt{x^2 + y^2 + z^2} + y \right) dx &= y \log \left( \sqrt{x^2 + y^2 + z^2} + x \right) \\ &+ x \log \left( \sqrt{x^2 + y^2 + z^2} + y \right) \\ &- z \arctan \left( \frac{xy}{z \sqrt{x^2 + y^2 + z^2}} \right) \\ &- x + z \arctan \left( \frac{x}{z} \right), \end{aligned}$$

we organize the solution to by defining functions  $f$ ,  $g$  and  $h$  as follows:

$$\begin{aligned} f(x, y, z) &= yz \log \left( \sqrt{x^2 + y^2 + z^2} + x \right) + xz \log \left( \sqrt{x^2 + y^2 + z^2} + y \right) - \\ &z^2 \arctan \left( \frac{xy}{z \sqrt{x^2 + y^2 + z^2}} \right), \end{aligned}$$

which is well-defined for all  $x, y, z$ , including at the origin where the argument of the arctan function above assumes the limiting value  $1/\sqrt{3}$ ,

$$\begin{aligned} g(x_1, x_0, y_1, y_0, z_1, z_0) &= \left[ \{f(x_1, y_1, z_1) - f(x_0, y_1, z_1)\} - \{f(x_1, y_0, z_1) - f(x_0, y_0, z_1)\} \right] - \\ &\left[ \{f(x_1, y_1, z_0) - f(x_0, y_1, z_0)\} - \{f(x_1, y_0, z_0) - f(x_0, y_0, z_0)\} \right], \end{aligned}$$

and

$$\begin{aligned} h(a, b, c, u, v, w) &= g(a-u, -a-u, b-v, -b-v, c-w, -c-w) + \\ &g(b-v, -b-v, c-w, -c-w, a-u, -a-u) + \\ &g(c-w, -c-w, a-u, -a-u, b-v, -b-v). \end{aligned}$$

In terms of these functions, and in the case of  $\sigma_x = \sigma_y = \sigma_z = 1$ , the potential is given by

$$V(u, v, w) = \frac{1}{4\pi} \frac{h(a, b, c, u, v, w)}{2}$$

The general solution follows by a shift in the arguments of  $h$ :  $a \rightarrow \sigma_u a$ ,  $b \rightarrow \sigma_v b$ ,  $c \rightarrow \sigma_w c$ ,  $u \rightarrow \sigma_u u$ ,  $v \rightarrow \sigma_v v$ ,  $w \rightarrow \sigma_w w$  and a multiplicative factor:

$$V(u, v, w) = \frac{1}{4\pi} \frac{h(\sigma_u a, \sigma_v b, \sigma_w c, \sigma_u u, \sigma_v v, \sigma_w w)}{2\sigma_u \sigma_v \sigma_w}. \quad (2)$$
